# Supplementary material
Source: Research Square preprint supplement (doi:10.21203/rs.3.rs-9537769/v1)
Supplement: Supplementary file 1 [file 8b3e76eb21d4b8ac62c95d0f.docx]

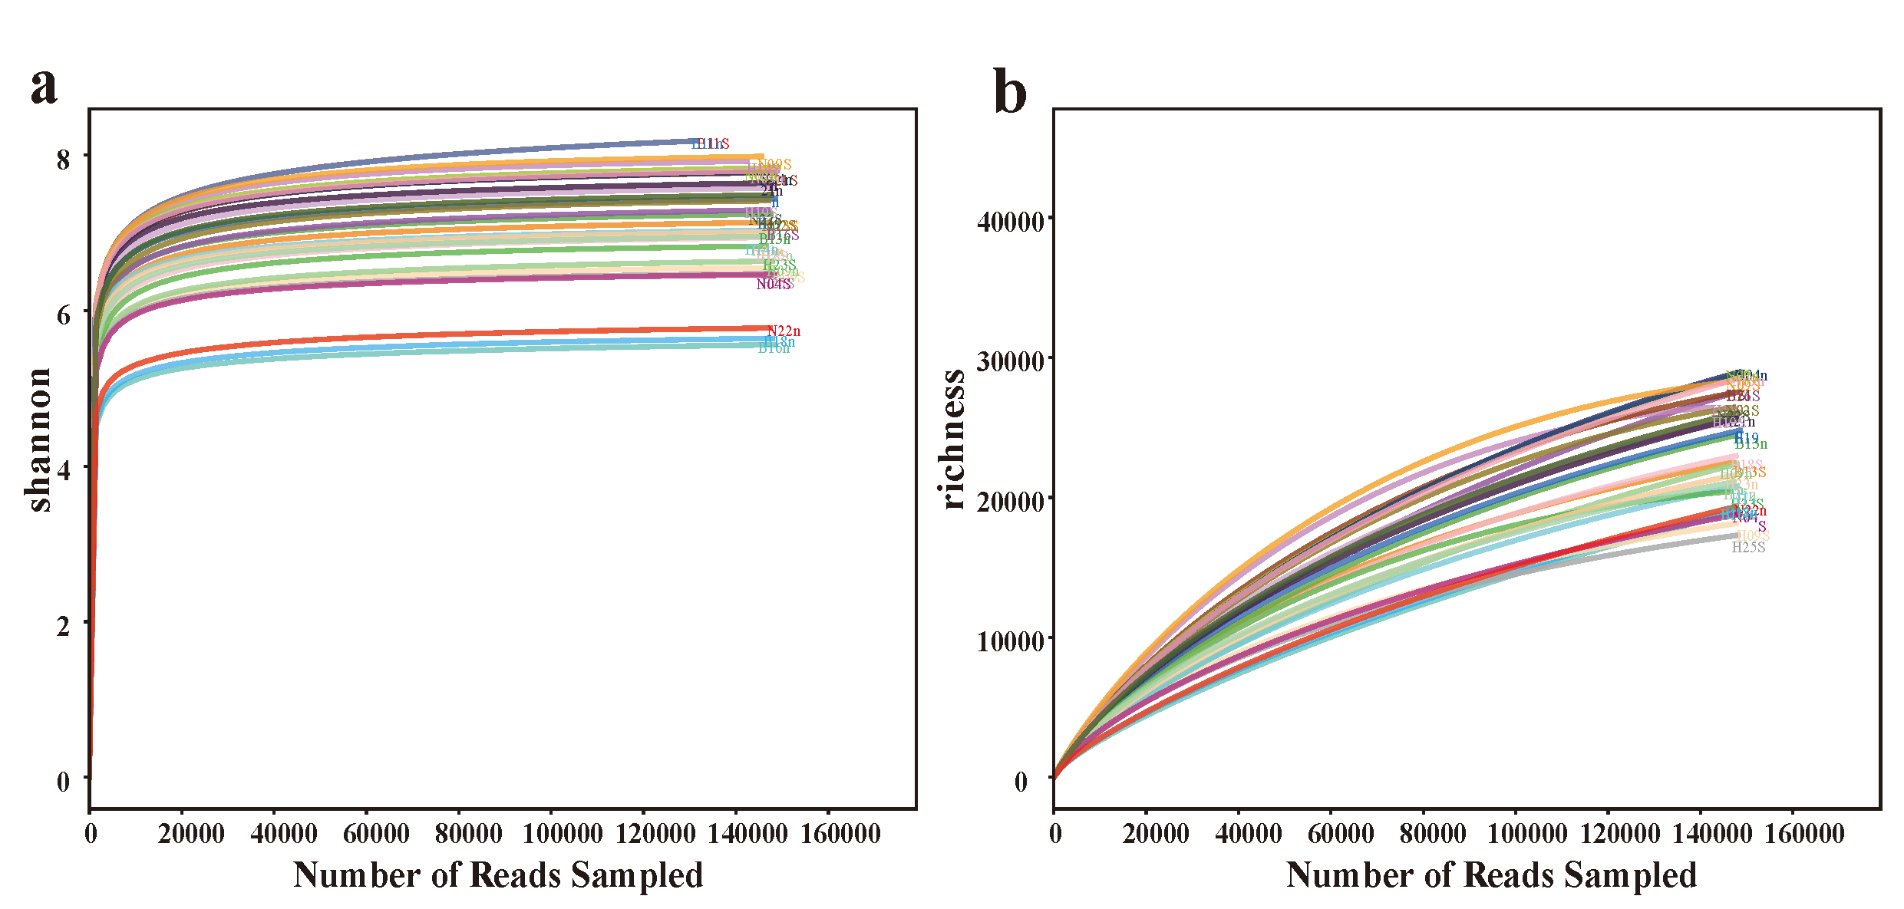


**Supplementary Figure S1.** Rarefaction curve of ASV numbers in eDNA samples.


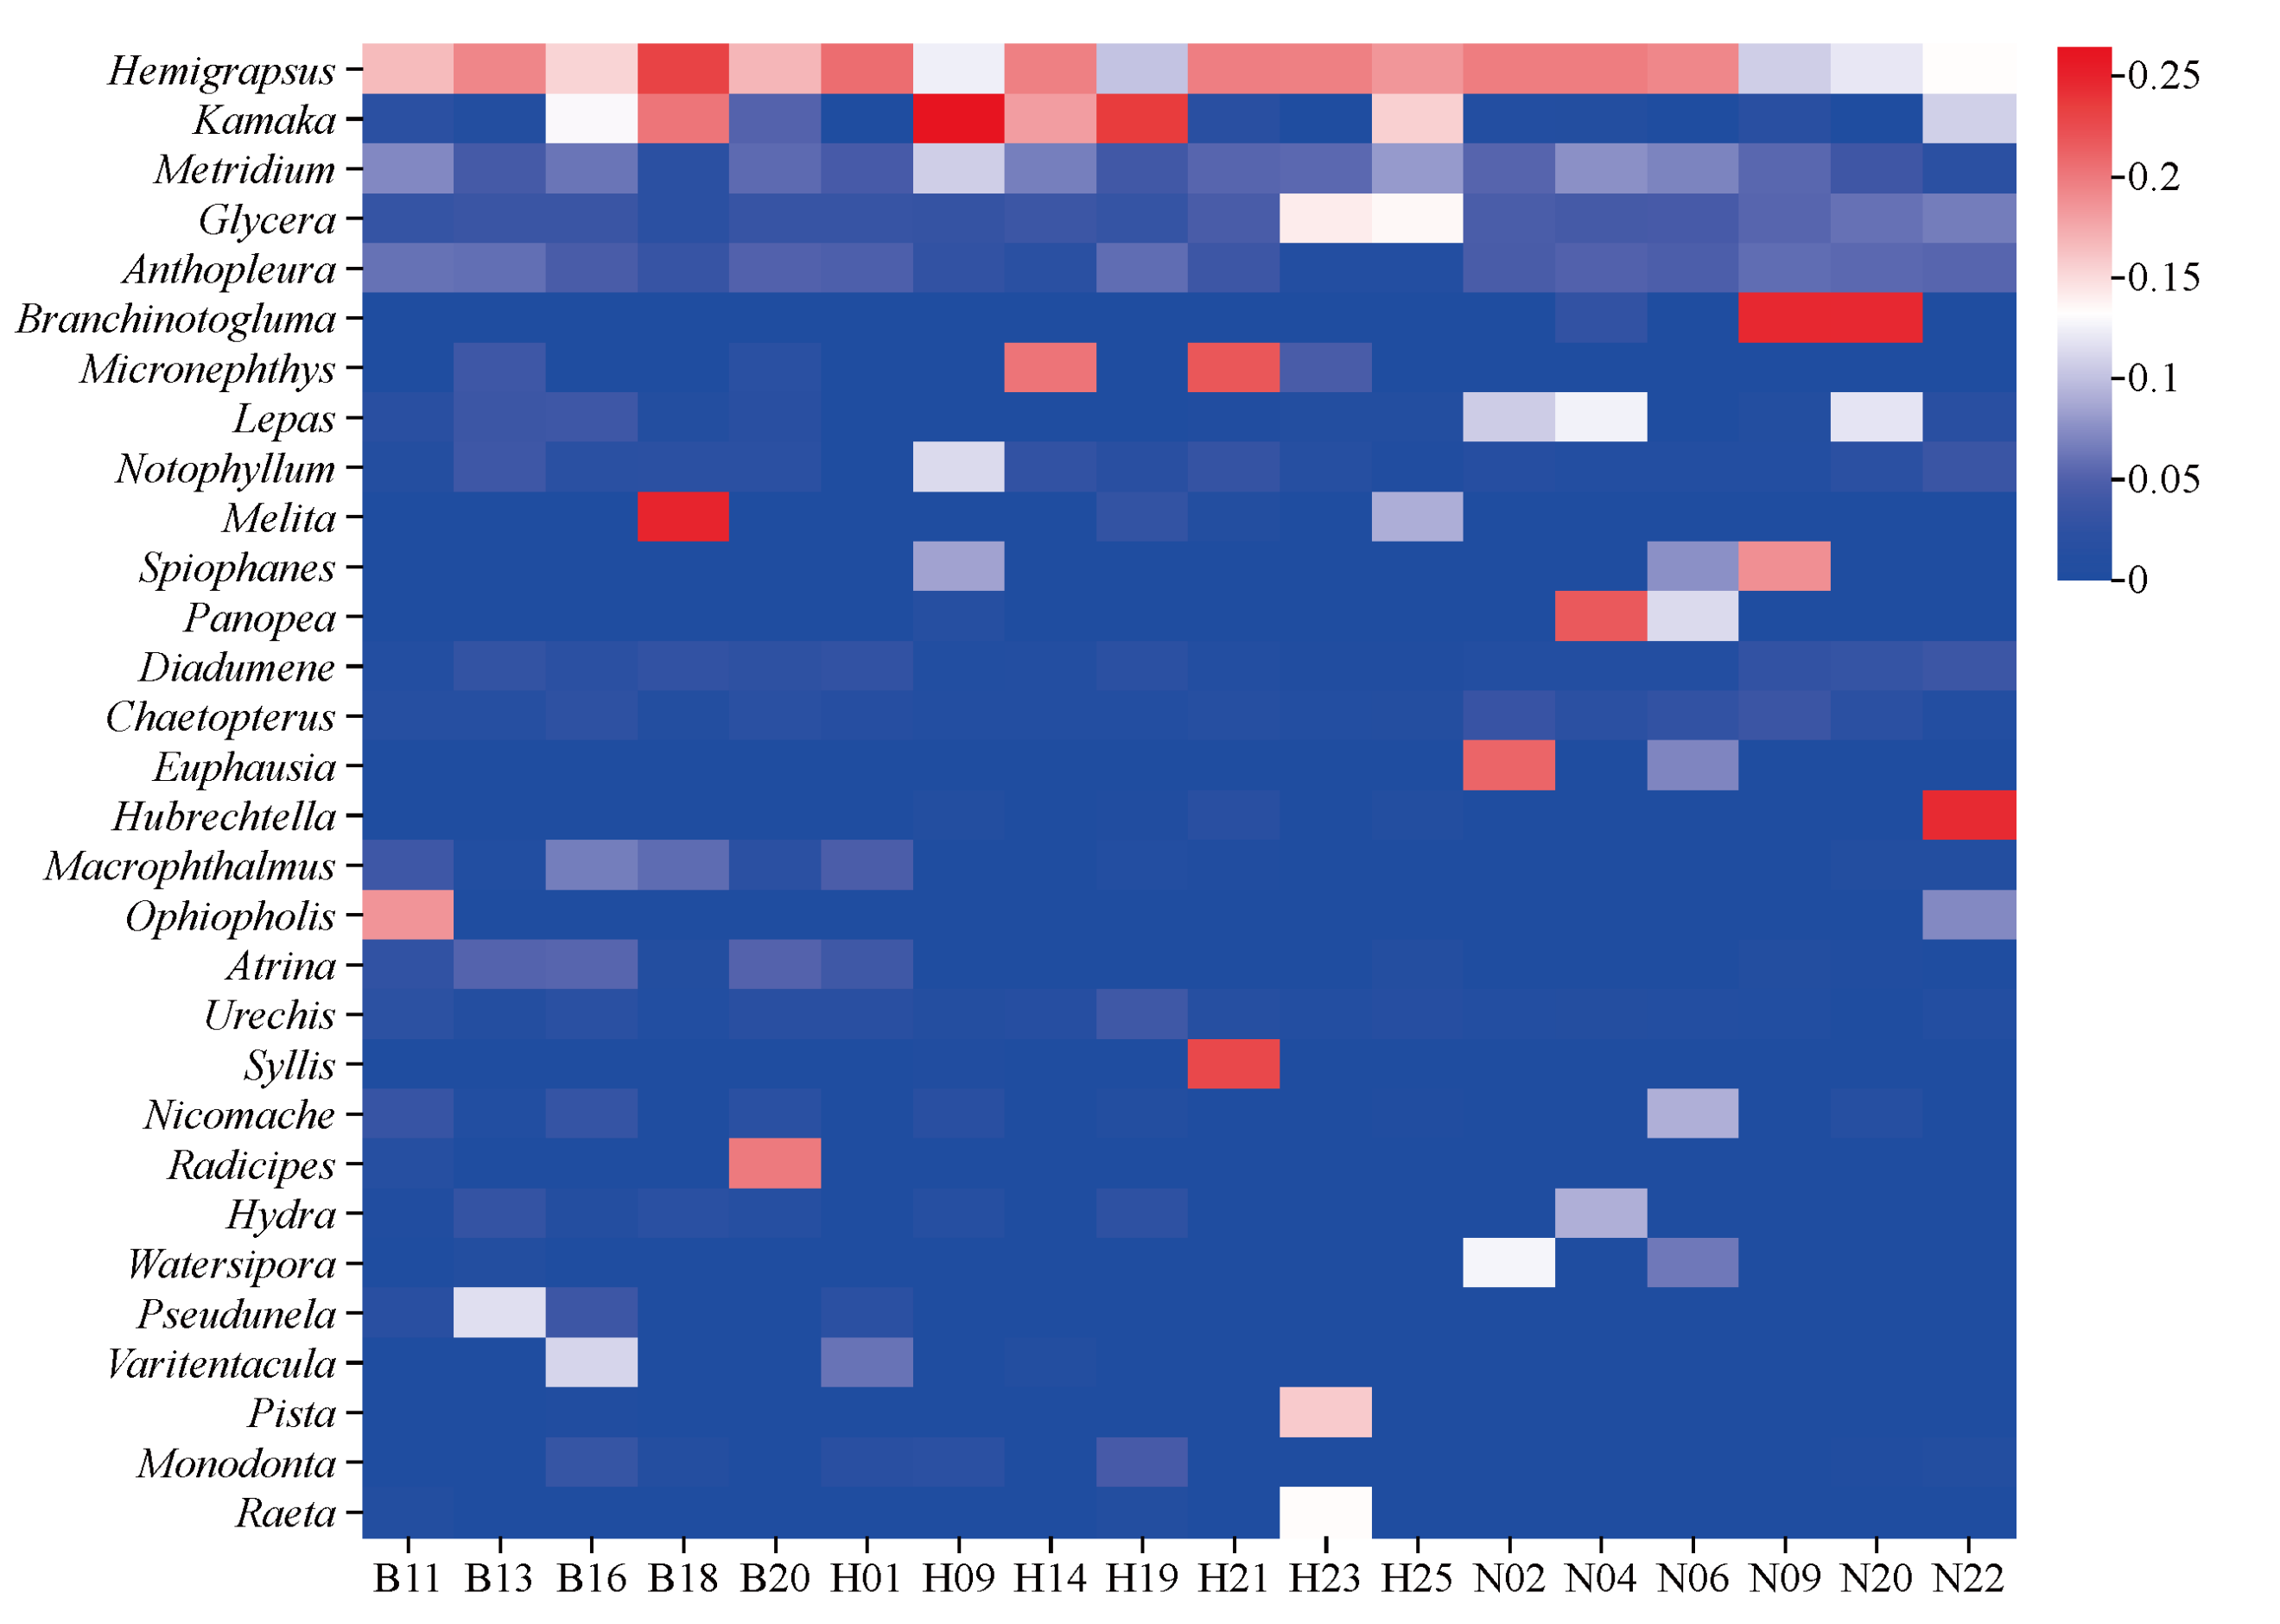


**Supplementary Figure S2.** Heat map of the relative abundance at the genus level of macrobenthos at each station in the Yellow and Bohai Seas.


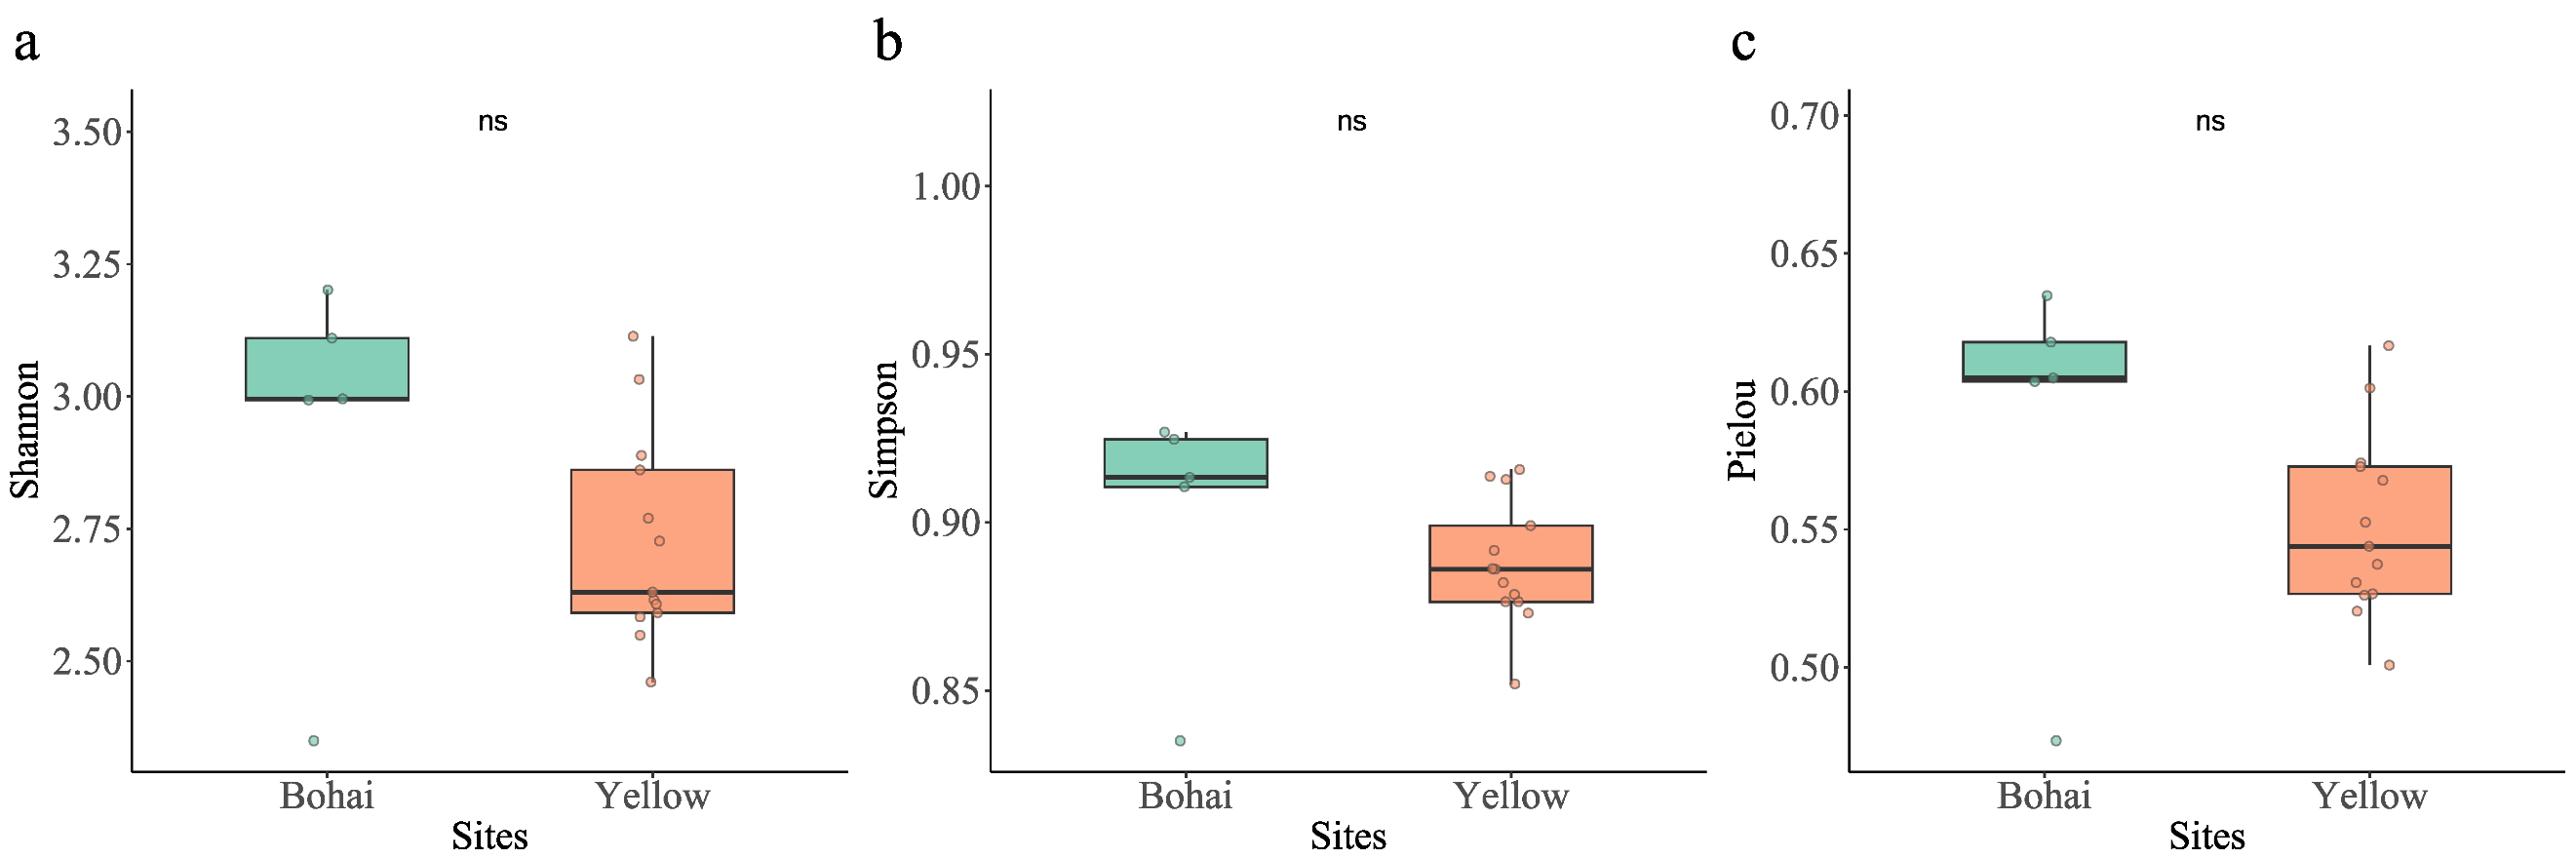


**Supplementary Figure S3.** Differences in the Yellow-Bohai Sea samples for Richness index (A), Shannon index (B), and Simpson index (C).

**Supplementary Table S1.** Correlation coefficients and significance test values of environmental factors on RDA ranking results.

|  | RDA1 | RDA2 | r2 | Pr(>r) |
| --- | --- | --- | --- | --- |
| Depth | 0.337840128 | -0.94120351 | 0.200255012 | 0.179 |
| Temperature | 0.850202274 | -0.526456165 | 0.291740656 | 0.082 |
| DO | -0.331769576 | 0.943360455 | 0.597165679 | 0.006 |
| pH | -0.794666292 | 0.607046526 | 0.029814257 | 0.811 |
| Salinity | 0.631758372 | -0.775165376 | 0.086674358 | 0.512 |
| NO3 | 0.275066034 | -0.961425336 | 0.144436742 | 0.305 |
| PO4 | -0.532489177 | -0.846436812 | 0.071308456 | 0.564 |
| NO2 | 0.999395036 | -0.034778752 | 0.173211892 | 0.258 |
| NH3 | 0.488404681 | -0.872617252 | 0.388188765 | 0.033 |
| SiO3 | 0.794374463 | -0.60742836 | 0.152327039 | 0.29 |

**Supplementary Table S2.** This study provides latitude and longitude information for the ecological survey stations on theYellow Sea and Bohai Sea.

| station | lat | lon |
| --- | --- | --- |
| H01 | 32.96666667 | 124 |
| H09 | 33.98333333 | 123.5 |
| H14 | 34.98 | 122.5 |
| H19 | 35.98 | 121 |
| H21 | 36 | 122 |
| H23 | 35.98 | 123 |
| H25 | 36 | 123.95 |
| N02 | 37.88833333 | 123 |
| N04 | 38.26333333 | 123.35 |
| N06 | 38.63833333 | 123.65 |
| N09 | 39.2 | 124.1 |
| N21 | 38.18 | 121.28 |
| N23 | 38.46 | 121.36 |
| B11 | 39.65 | 120.65 |
| B13 | 39.335 | 120.2916667 |
| B16 | 38.86166667 | 119.755 |
| B18 | 38.545 | 119.3983333 |
| B20 | 38.23 | 119.04 |
